# Supplementary material
Source: PubMed Central journal article supplement (PMC7768784)
Supplement: pnas.2016025117.sapp.pdf [file pnas.2016025117.sapp.pdf]

# Supplementary Information for *Multiscale integration of environmental stimuli in plant tropism produces complex behavior*

Derek E. Moulton, Hadrien Oliveri, and Alain Goriely

Mathematical Institute, University of Oxford, Oxford OX2 6GG, United Kingdom

## 1. Rod geometry and Kirchhoff equations

The morphology of the plant is determined by solving the Kirchhoff equations for an elastic rod with non-zero evolving intrinsic curvature and axial growth. Here we briefly recall the basic elements of Cosserat rod theory. A *rod* is a space curve  $\mathbf{r}(S) \in \mathbb{R}^3$ , known as the *centerline*, equipped with two additional unit orthonormal vector fields  $(\mathbf{d}_1(S), \mathbf{d}_2(S))$  representing the orientation of a cross section at  $S$ . The *general frame* is obtained by defining  $\mathbf{d}_3(S) = \mathbf{d}_1(S) \times \mathbf{d}_2(S)$  and we note that  $\{\mathbf{d}_1, \mathbf{d}_2, \mathbf{d}_3\}$  forms a right-handed orthonormal basis. The components of a vector  $\mathbf{a} = \mathbf{a}_1\mathbf{d}_1 + \mathbf{a}_2\mathbf{d}_2 + \mathbf{a}_3\mathbf{d}_3$  in the local basis are denoted by  $\mathbf{a} = (\mathbf{a}_1, \mathbf{a}_2, \mathbf{a}_3)$ . We note that  $|\mathbf{a}| = |\mathbf{a}|$ .

We choose the material parameter  $s$  to be the current arc length, i.e. in the grown configuration, and  $S$  to be the material arc length in an initial pre-grown configuration. These are related by the growth stretch

$$\gamma := \frac{\partial s}{\partial S}. \quad [1]$$

For an unshearable rod, we may choose  $\mathbf{d}_3$  to align with the tangent direction, so that

$$\frac{\partial \mathbf{r}}{\partial s} = \mathbf{d}_3, \quad [2]$$

or equivalently

$$\frac{\partial \mathbf{r}}{\partial S} = \gamma \mathbf{d}_3. \quad [3]$$

A complete kinematic description of the frame is given by:

$$\frac{\partial \mathbf{d}_i}{\partial s} = \mathbf{u} \times \mathbf{d}_i, \quad i = 1, 2, 3, \quad [4]$$

where  $\mathbf{u}$  is the *Darboux vector*. The first two components  $(\mathbf{u}_1, \mathbf{u}_2)$  of the Darboux vector are associated with the Frenet curvature while  $\mathbf{u}_3$  represents twisting, that is the rotation of the basis (not the curve) around the  $\mathbf{d}_3$  vector. It contains both information on the Frenet torsion  $\tau$  of the centerline and on the rotation of the cross section for increasing values of  $s$ .

In particular, if the rod is assumed to be inextensible, the Darboux vector is related to the usual notion of Frenet curvature and torsion  $\kappa$  and  $\tau$  by

$$\cot \varphi = \frac{\mathbf{u}_2}{\mathbf{u}_1}, \quad [5]$$

$$\kappa = \sqrt{\mathbf{u}_1^2 + \mathbf{u}_2^2}, \quad [6]$$

$$\tau = \mathbf{u}_3 + \frac{\mathbf{u}_2' \mathbf{u}_1 - \mathbf{u}_1' \mathbf{u}_2}{\mathbf{u}_1^2 + \mathbf{u}_2^2}. \quad [7]$$

where prime denotes differentiation with respect to current arc length  $s$ . Also,  $\varphi$  is the angle between the normal and the vector  $\mathbf{d}_1$ . The quantity  $\partial\varphi/\partial s$ , the *excess twist*, represents the rotation of the local basis with respect to the Frenet frame as the arc length increases.

30 The stress on the cross section at  $\mathbf{r}(s)$  from adjacent segments with larger material coordinates ( $s' > s$ )  
 31 gives rise to a *resultant force*  $\mathbf{n}(s)$  and *resultant couple*  $\mathbf{m}(s)$ . These satisfy the balance of linear and angular  
 32 momentum, which in mechanical equilibrium read:

$$33 \quad \frac{\partial \mathbf{n}}{\partial s} + \mathbf{f} = \mathbf{0}, \quad [8]$$

$$34 \quad \frac{\partial \mathbf{m}}{\partial s} + \frac{\partial \mathbf{r}}{\partial s} \times \mathbf{n} = \mathbf{0}. \quad [9]$$

36 Here  $\mathbf{f}$  is a linear force density accounting for any external forces acting on the rod, such as contact forces.

37 The system is closed by boundary conditions and constitutive laws. We restrict to an inextensible rod in  
 38 this paper, and thus only a constitutive equation relating moment  $\mathbf{m}$  to curvature is needed. For a quadratic  
 39 elastic energy, this takes the general form  $\mathbf{m} = \mathbf{K}(\mathbf{u} - \hat{\mathbf{u}})$ , where  $\mathbf{K}$  is a stiffness matrix. Considering the  
 40 simplest and most widely used case of a diagonal  $\mathbf{K}$ , we have

$$41 \quad \mathbf{m} = K_1(u_1 - \hat{u}_1)\mathbf{d}_1 + K_2(u_2 - \hat{u}_2)\mathbf{d}_2 + K_3(u_3 - \hat{u}_3)\mathbf{d}_3. \quad [10]$$

42 In this case, the Kirchhoff theory tells us that the stiffnesses are

$$43 \quad K_1 = E\mathcal{I}_1, \quad K_2 = E\mathcal{I}_2, \quad K_3 = \mu J \quad [11]$$

44 where  $E$  is the Young's modulus,  $\mu$  the second Lamé parameter and  $J, \mathcal{I}_{1,2}$  depend on the cross-sectional  
 45 shape (see main text).

46 In terms of boundary conditions, we primarily consider a plant that is held clamped at one end and free  
 47 at the other. Denoting the clamped end  $s = 0$ , and the free end  $s = \ell$ , these amount to fixing the position  
 48 and frame at  $s = 0$ :

$$49 \quad \mathbf{r}(0, t) = \mathbf{r}_0, \quad \mathbf{d}_i(0, t) = \mathbf{d}_{i,0}, \quad i = 1, 2, 3, \quad [12]$$

50 and imposing zero force and moment at  $s = \ell$ :

$$51 \quad \mathbf{m}(\ell, t) = \mathbf{n}(\ell, t) = \mathbf{0}. \quad [13]$$

52 As the elastic timescale is much shorter than the growth timescale, mechanical equilibrium is assumed  
 53 at all times, and the intrinsic curvatures and growth stretch  $\gamma$  are updated in a quasi-static fashion via a  
 54 simple forward Euler time-stepping of the appropriate evolution law.

## 55 2. From 3D growth field to 1D elasticity

56 In order to use the Kirchhoff equations described in the previous section, we need to obtain the intrinsic  
 57 curvatures from the tropism models. These are obtained as solutions of evolution equations. Here, we follow  
 58 the framework of (1) to obtain the intrinsic curvatures from a growth tensor defined on a 3D tubular  
 59 structure. In this framework, we define the centerline as the curve passing through the centroids of each  
 60 cross section so that

$$61 \quad \int_{\Omega_S} x_1 dx_1 dx_2 = \int_{\Omega_S} x_2 dx_1 dx_2 = \int_{\Omega_S} x_1 x_2 dx_1 dx_2 = 0. \quad [14]$$

At any point in the material, the growth tensor can be written

$$\mathbf{G} = G_{ij}\mathbf{e}_i \otimes \mathbf{e}_j, \quad i, j = 1, 2, 3,$$

62 where in general each  $G_{ij}$  may be functions of position, and  $(\mathbf{e}_1, \mathbf{e}_2, \mathbf{e}_3)$  are Cartesian basis vectors that are  
 63 chosen to coincide with the frame  $(\mathbf{d}_1, \mathbf{d}_2, \mathbf{d}_3)$  in the initial pre-deformed state of the plant.

Conceptually, the components of  $\mathbf{G}$  define the expansion (or contraction) of material both as a local property and as directional quantities. For example, if  $G_{11} > 1$  then cells will expand in the  $\mathbf{d}_1$  direction. The determinant of  $\mathbf{G}$  describes the net gain or loss of mass at each point; here it is worthwhile to note that growth without a change of mass is possible, and it is also possible to have a growth field for which points gain or lose mass while the total mass for a cross section stays fixed.

The quantity that is of most relevance for capturing a tropic growth response is the term  $G_{33}$ ; this term describes axial elongation; it is the heterogeneity of this term across a section that generates curvature in the plant. While other terms may play a role, for instance in changing the cross-sectional geometry, we posit that this will typically be a secondary effect (for the general theory see (1)) and we assume the form

$$\mathbf{G} = \text{diag}(1, 1, 1 + g). \quad [15]$$

For this growth tensor, the key result of (1) is that the intrinsic curvatures are given explicitly by

$$\mathcal{I}_1 \hat{u}_1(S, t) = \int_{\Omega_S} x_2 g(x_1, x_2, S, t) dx_1 dx_2, \quad \mathcal{I}_2 \hat{u}_2(S, t) = - \int_{\Omega_S} x_1 g(x_1, x_2, S, t) dx_1 dx_2, \quad \hat{u}_3 = 0, \quad [16]$$

where

$$\mathcal{I}_1 := \int_{\Omega_S} x_2^2 dx_1 dx_2, \quad \mathcal{I}_2 := \int_{\Omega_S} x_1^2 dx_1 dx_2$$

are the second moments of area. A straightforward extension of the derivation given in (1) shows that the axial elongation  $\gamma$  is given by

$$\mathcal{A} \gamma = \int_{\Omega_S} g(x_1, x_2, S, t) dx_1 dx_2, \quad [17]$$

where  $\mathcal{A}$  is the cross-sectional area. Note in particular that if  $g$  is constant, then from Eq. (14) it follows that no curvature is generated, and the axial extension is equal to  $g$ ; this reflects the simple and intuitive notion that uniform axial growth does not create bending.

### 3. Obtaining curvature and growth evolution laws

As described in the main text, the axial growth  $g$  is connected to auxin concentration  $A(x_1, x_2, s, t)$  by a growth law, assumed to have the form

$$\frac{\partial g}{\partial t} = \beta(A - A^*). \quad [18]$$

Since the shape of the cross sections is assumed to remain constant in time, we can take a time derivative across equations Eqs. (16) and (17) and utilize Eq. (18) to obtain evolution laws for the curvatures:

$$\mathcal{I}_1 \frac{\partial \hat{u}_1}{\partial t} = \beta \int_{\Omega_S} x_2 A dx_1 dx_2, \quad \mathcal{I}_2 \frac{\partial \hat{u}_2}{\partial t} = -\beta \int_{\Omega_S} x_1 A dx_1 dx_2, \quad \frac{\partial \hat{u}_3}{\partial t} = 0. \quad [19]$$

And similarly, the evolution law for the axial extension is

$$\mathcal{A} \frac{\partial \gamma}{\partial t} = \beta \int_{\Omega_S} (A - A^*) dx_1 dx_2. \quad [20]$$

The approach outlined in (1) allows for more generic growth tensor  $\mathbf{G}$ , in which case the bending stiffnesses about the  $\mathbf{d}_1$  and  $\mathbf{d}_2$  axes, as well as the torsional stiffness, can also change due to the growth. However, for the growth tensor (15), the stiffnesses are not impacted by  $g$ . Hence, for this modeling choice, when passing from tissue to organ scale, the tropic response is entirely encoded by the change in the intrinsic curvature of the plant as well as any axial extension.

An extension of this model to include *autotropism* consists in adding a decay term

$$\frac{\partial g}{\partial t} = \beta(A - A^*) - \xi(g - \bar{g}), \quad [21]$$

98 where

$$99 \quad \bar{g} = \frac{1}{\mathcal{A}} \int_{\Omega_S} g \, dx_1 dx_2,$$

100 is the growth field average. The extra term  $\xi(g - \bar{g})$  is the deviation of the growth field from its average  
 101 value, thus providing a point-wise measure of the strain induced by differential growth. This term only  
 102 impacts on the evolution laws for curvature, since it is differential growth that produces curvature. If, for  
 103 instance,  $g > 1$  is constant across the section, axial extension will occur without any curvature generation,  
 104 and the autotropic term will not have an influence.

105 Specifically, note that the curvature evolution laws Eq. (19) become

$$106 \quad \mathcal{I}_1 \frac{\partial \hat{u}_1}{\partial t} = \beta \int_{\Omega_S} x_2 A \, dx_1 dx_2 - \mathcal{I}_1 \xi u_1, \quad \mathcal{I}_2 \frac{\partial \hat{u}_2}{\partial t} = -\beta \int_{\Omega_S} x_1 A \, dx_1 dx_2 - \mathcal{I}_2 \xi u_2. \quad [22]$$

107 while the axial evolution law Eq. (20) is unchanged since

$$108 \quad \int_{\Omega_S} (g - \bar{g}) dx_1 dx_2 = 0 \quad [23]$$

109 by definition of  $\bar{g}$ . In light of the form of Eqs. (19), (20) and (22), the objective for any given tropic stimulus  
 110 is thus to obtain an expression for the terms

$$111 \quad \int_{\Omega_S} x_2 A \, dx_1 dx_2, \quad \int_{\Omega_S} x_1 A \, dx_1 dx_2, \quad \int_{\Omega_S} A \, dx_1 dx_2 \quad [24]$$

112 via manipulation of the transport equation; given these, the evolution rules follow both with and without  
 113 autotropism. We consider each tropism stimulus separately in the following section.

#### 114 4. Specific curvature evolution laws

115 In this section we outline the steps to obtain the curvature evolution laws given in the main text from the  
 116 assumptions on auxin transport and via the general evolution equations Eqs. (19) and (20). We first discuss  
 117 estimates of the different components of the auxin transport equation, and then each tropism is considered  
 118 in turn.

119 **A. Comparing advection, diffusion, and turnover.** One feature that is common to all evolution laws below  
 120 is that we consider advection-dominated auxin transport, i.e. we restrict our attention to the zero-  
 121 diffusion limit. To study the relative importance of advection and diffusion we compare the diffusive flux  
 122  $\mathbf{J}^{\text{diff}} = -D \nabla A$ , where  $D$  is a diffusion coefficient, and an advective flux due to the environmental stimulus,  
 123 which will generally take the form  $\mathbf{J}^{\text{stim}} = k \mathbf{A} \mathbf{F}$ , for a given auxin flow direction  $\mathbf{F}$  (where  $|\mathbf{F}| = 1$ ) and  
 124 with flow rate  $k$ . Due to the nature of our tissue-level description of auxin transport, the parameters  $k$   
 125 and  $D$  are difficult to quantify directly. Indeed, at the cellular level, models of auxin transport (2) are  
 126 highly dependent on cell geometry, and auxin flux may differ significantly in the cytoplasm compared  
 127 to the apoplast, due to varying diffusivity. Additionally, the parameter  $k$  may be a proxy for multiple  
 128 processes. For instance, in cell-based models of gravitropism, e.g. (3), the gravitational stimulus is modeled  
 129 by modifying PIN efflux carrier locations on particular cells, based on the stem orientation with respect to  
 130 gravity. In this approach, the flux  $\mathbf{J}^{\text{stim}}$  serves as a tissue-level proxy for a complex interaction of proteins  
 131 and auxin transport both through and across cells; which cannot be easily related to a single parameter  $k$ .  
 132 Moreover, this parameter is also related to the timescale of statoliths settling, e.g. (4).

133 To our knowledge, there is no well-established tissue-level auxin transport models and further experimental  
 134 work, as well as explicit modeling connecting cell to tissue scales, is needed to identify these parameters. In  
 135 the absence of such a theory, we can, nevertheless, justify the zero-diffusion limit  $D = 0$  by estimating, in

136 the transport equation, the relative size of the diffusion and advection terms as follows:

$$137 \quad \nabla \cdot \mathbf{J}^{\text{diff}} = D\nabla^2 A \sim [A] \frac{[D]}{[L]^2} \quad [25]$$

$$138 \quad \nabla \cdot \mathbf{J}^{\text{stim}} = k\nabla \cdot (A\mathbf{F}) \sim [A] \frac{[k]}{[L]}, \quad [26]$$

139 where the symbol “ $\sim$ ” denotes a scaling estimate and the bracket denotes the dimensions (e.g.  $L$  is the  
 140 lengthscale of advection/diffusion so that  $[L]$  has the dimension of a length). To compare the relative size  
 141 of these terms, note that in studies of the transport of an auxin pulse, auxin velocity has been measured to  
 142 be on the order of  $V \sim 1 \text{ cm/hr} \approx 3 \cdot 10^{-4} \text{ cm/s}$  (5), while the diffusion coefficient for auxin in aqueous  
 143 solution has been estimated to be around  $D \sim 10^{-6} \text{ cm}^2/\text{s}$  (6) (and is presumed to be smaller in cytoplasm  
 144 (5)). Note that  $L$  can vary significantly depending on the plant/organ under consideration, but for axial  
 145 transport we have a typical  $L$  between 1 and 10 cm, while for cross-sectional transport we take  $L \sim 0.1 \text{ cm}$ .  
 146 For  $L \sim 10 \text{ cm}$  we estimate

$$147 \quad \nabla \cdot \mathbf{J}^{\text{diff}} \sim [A]10^{-8}\text{s}^{-1}, \quad \nabla \cdot \mathbf{J}^{\text{stim}} \sim [A]3 \cdot 10^{-5}\text{s}^{-1},$$

148 while for  $L \sim 0.1 \text{ cm}$ , we have

$$149 \quad \nabla \cdot \mathbf{J}^{\text{diff}} \sim [A]10^{-4}\text{s}^{-1}, \quad \nabla \cdot \mathbf{J}^{\text{stim}} \sim [A]3 \cdot 10^{-3}\text{s}^{-1}.$$

150 These estimates show that axial diffusion is negligible but that it may play a role in cross-sectional transport,  
 151 though is still an order of magnitude smaller than might be expected from advection.

152 For the turnover modeled by the term  $-QA$  in the transport equation, it is more difficult to obtain an  
 153 estimate. However, in the case of an auxin source, the inclusion of turnover in the model enables to define  
 154 a characteristic ‘bending length’  $l = U/Q$ , which gives the distance from the source within which the tropic  
 155 bending response occurs. Thus, we may estimate  $Q$  from the bending length and velocity. Taking  $l \sim 1 \text{ cm}$   
 156 and with  $U \sim 3 \cdot 10^{-4} \text{ cm/s}$ , we obtain  $Q = U/l \sim 3 \cdot 10^{-4} \text{ s}^{-1}$ .

157 From a mathematical point of view, it is worth noting that in the cases of axial transport, the curvature  
 158 evolution equations derived below can be obtained for zero turnover, and indeed would correspond to  
 159 the derived forms in the well-defined limit of  $Q \rightarrow 0$ . The case of gravitropism is different in this regard,  
 160 however, as gravitropism involves a cross-sectional auxin flow. The mathematical steps described below do  
 161 not work in the case of zero turnover, i.e.  $Q \rightarrow 0$  is a singular limit of the resulting gravitropic curvature  
 162 evolution (which can be understood physically since, in the absence of turnover, auxin increases without  
 163 bound).

164 Furthermore, it is worth highlighting that the limit case  $D = 0$  enables for analytical tractability, and  
 165 as shown below is key in establishing explicit curvature evolution laws. In the case of  $D \neq 0$ , the general  
 166 model formulation remains valid, but the solution techniques applied below would not be directly applicable  
 167 and may require a full computational approach to solving for auxin concentration.

168 **B. Gravitropism.** In the case of gravitropism, we consider a gravity driven auxin flux  $\mathbf{J}^{\text{stim}} = kA\mathbf{f}$ , where  
 169  $\mathbf{f} := f_1\mathbf{d}_1 + f_2\mathbf{d}_2$  describes the cross-sectional component of the direction of gravity expressed in the local  
 170 frame. The parameter  $k$  describes the gravitropic auxin flow rate. Since auxin transport timescales are  
 171 generally smaller than the timescale associated with growth (7), and transport is only occurring on the  
 172 short cross-sectional lengthscale, we also take the auxin concentration to be at steady state. Under these  
 173 assumptions, the auxin concentration satisfies

$$174 \quad \nabla \cdot (kA\mathbf{f}) = -QA + C_{\text{in}}\delta(r - r_0) - C_{\text{out}}\delta(x_1)\delta(x_2). \quad [27]$$

175 Here, the divergence is only taken in the cross-sectional variables  $(x_1, x_2)$ , and  $Q$  is the turnover. The  
 176 second and third terms on the right hand side account for a source  $C_{\text{in}}$  and sink  $C_{\text{out}}$  of auxin in each cross

177 section, providing a simple model of auxin transport routes. In particular, we consider here a source at  
 178 radius  $r = r_0$ , which may for instance be taken to be near the cross-sectional radius in the case of epidermal  
 179 auxin flow, and a sink at the center. These terms are needed simply to provide a source of auxin to be  
 180 transported under gravity and stimulate growth; the specifics of these choices do not impact on the resulting  
 181 equations.

182 Combining Eqs. (18), (19) and (27), and using Eq. (14), we obtain the following equation for the intrinsic  
 183 curvature  $\hat{u}_1$ :

$$184 \quad \mathcal{I}_1 \frac{\partial \hat{u}_1}{\partial t} = \beta \int_{\Omega_S} x_2 (A - A^*) dx_1 dx_2 = -\frac{\beta}{Q} \int_{\Omega_S} x_2 (\nabla \cdot k \mathbf{A} \mathbf{f}) dx_1 dx_2. \quad [28]$$

185 Note that the source and sink terms both vanish on a circular cross section, as does the  $A^*$  term, assuming  
 186  $A^*$  is constant. This form for  $\partial \hat{u}_1 / \partial t$  is not very useful, as it would still require solving for the auxin  
 187 concentration at each time step. However, we may determine the evolution laws without explicitly solving  
 188 for  $A$ , by noting the following identity

$$189 \quad x_2 \nabla \cdot (k \mathbf{A} \mathbf{f}) = \nabla \cdot (x_2 k \mathbf{A} \mathbf{f}) - \nabla x_2 \cdot k \mathbf{A} \mathbf{f} = \nabla \cdot (x_2 k \mathbf{A} \mathbf{f}) - k \mathbf{A} \mathbf{f}_2, \quad [29]$$

190 since  $\nabla x_2 = \mathbf{d}_2$ . Therefore, when integrating over the cross section, we have

$$191 \quad \int_{\Omega_S} x_2 (\nabla \cdot k \mathbf{A} \mathbf{f}) dx_1 dx_2 = \int_{\Omega_S} \nabla \cdot (x_2 k \mathbf{A} \mathbf{f}) dx_1 dx_2 - k \mathbf{f}_2 \int_{\Omega_S} A dx_1 dx_2 = -k \mathbf{f}_2 \int_{\Omega_S} A dx_1 dx_2, \quad [30]$$

192 where we have used the divergence theorem and the no-flux boundary condition  $\mathbf{J} \cdot \mathbf{n} = k \mathbf{A} \mathbf{f} \cdot \mathbf{n} = \mathbf{0}$  on  $\partial \Omega_S$   
 193 to write

$$194 \quad \int_{\Omega_S} \nabla \cdot (x_2 k \mathbf{A} \mathbf{f}) dx_1 dx_2 = \int_{\partial \Omega_S} x_2 k \mathbf{A} \mathbf{f} \cdot \mathbf{n} ds = 0. \quad [31]$$

195 The problem is now reduced to evaluating an integral of only  $A$  over the cross section. We may again insert  
 196  $A$  via Eq. (27); the divergence term again vanishes by the no-flux boundary condition, while the delta  
 197 function terms integrate to a constant  $\Delta C = C_{\text{in}} - C_{\text{out}}$ , i.e. the net auxin available in the cross section, so  
 198 that

$$199 \quad \int_{\Omega_S} x_2 (\nabla \cdot k \mathbf{A} \mathbf{f}) dx_1 dx_2 = -\frac{k}{Q} \Delta C \mathbf{f}_2, \quad [32]$$

200 Combining the above, we obtain the relation provided in the main text:

$$201 \quad \frac{\partial \hat{u}_1}{\partial t} = \mathcal{C}_{\text{grav}} \mathbf{f}_2, \quad [33]$$

202 where  $\mathcal{C}_{\text{grav}} = \beta k \Delta C / (\mathcal{I}_1 Q^2)$ . Similar steps lead to the evolution equations for  $\hat{u}_2$  and  $\gamma$  as appearing in the  
 203 main text:

$$204 \quad \frac{\partial \hat{u}_2}{\partial t} = -\mathcal{C}_{\text{grav}} \mathbf{f}_1, \quad [34]$$

$$205 \quad \frac{\partial \gamma}{\partial t} = \beta \left( \frac{\Delta C}{Q A} - A^* \right). \quad [35]$$

207 Note that some plant organs align in a direction different to that of the gravitational field; the so-called  
 208 gravitational setpoint angle (GSA) is often observed in branches of higher plants (8). In such branches, there  
 209 exists an auxin-dependent ‘antigravitropic’ offset mechanism, effectively countering partially the growth  
 210 response of auxin due to statolith settling under gravity (9). This mechanism can be easily included in our  
 211 framework by altering the local gravitational field  $\mathbf{f}$  to include the combined (and weighted) gravitational  
 212 field and ‘antigravitational’ field, i.e.  $\mathbf{f}$  would point in the direction of the GSA; however a full treatment of  
 213 the problem likely would require consideration of the signaling pathways in the antigravitropic offset as  
 214 shown in (9).  
 215

216 **C. Phototropism.** In the case of phototropism, we consider the following axial auxin transport equation

$$217 \quad \frac{\partial A}{\partial t} - \frac{\partial}{\partial s}(UA) = -QA, \quad [36]$$

218 and with an auxin source at the tip  $s = \ell$  given by:

$$219 \quad A_{\text{tip}}(x_1, x_2, t) = -\kappa I(t) (\mathbf{e}_1(t)x_1 + \mathbf{e}_2(t)x_2) \quad [37]$$

220 where  $\mathbf{e}$  is a unit vector pointing from the tip to the light source,  $I$  characterizes the intensity of the light,  
 221 and  $\kappa$  characterizes the strength of the response to generate auxin. The fact that light induces an auxin  
 222 gradient in the phototropic response is well established (10) and, in the absence of supplementary evidence,  
 223 the simplest modeling choice is to assume that this gradient is linear. An exact solution to Eqs. (36)  
 224 and (37) is given by

$$225 \quad A(x_1, x_2, s, t) = A_{\text{tip}} \left( x_1, x_2, t - \frac{\ell - s}{U} \right) \exp \left( -\frac{Q(\ell - s)}{U} \right). \quad [38]$$

226 Following Eq. (19), we multiply by  $x_2$  and integrate over a cross section. Since Eq. (37) gives  $A$  as a linear  
 227 function of  $x_1, x_2$ , then using Eq. (14), we obtain the curvature evolution given in the main text:

$$228 \quad \frac{\partial \hat{u}_1}{\partial t} = -C_{\text{photo}} \exp \left( -\frac{Q(\ell - s)}{U} \right) \mathbf{e}_2 \left( t - \frac{\ell - s}{U} \right), \quad [39]$$

229 where  $C_{\text{photo}} = \beta \kappa I(t)$ , and similarly for  $\partial \hat{u}_2 / \partial t$ .

230 In the formulation outlined above, there is no axial growth component, i.e.  $\dot{\gamma} = 0$ , since the integral  
 231 of  $A$  over each cross-section is zero due to the form of  $A_{\text{tip}}$ . We may naturally incorporate axial growth  
 232 by adding source and sink terms, as appeared in the gravitropism case. That is, consider the transport  
 233 equation

$$234 \quad \frac{\partial A}{\partial t} - \frac{\partial}{\partial s}(UA) = -QA + C_{\text{in}}\delta(r - r_0) - C_{\text{out}}\delta(x_1)\delta(x_2). \quad [40]$$

235 Denoting the combined source and sink terms by  $\Delta C$ , then if this term is independent of  $s$  the solution is

$$236 \quad A(x_1, x_2, s, t) = \left[ A_{\text{tip}} \left( x_1, x_2, t - \frac{\ell - s}{U} \right) - \frac{\Delta C}{Q} \right] \exp \left( -\frac{Q(\ell - s)}{U} \right) + \frac{\Delta C}{Q}. \quad [41]$$

237 In this case, the curvature evolution laws are unchanged, while the axial growth satisfies

$$238 \quad \frac{\partial \gamma}{\partial t} = \beta \left[ \exp \left( -\frac{Q(\ell - s)}{U} \right) \left( \frac{\Delta C}{Q} - 1 \right) - A^* \right]. \quad [42]$$

239 This formulation naturally produces growth focused at the tip, with growing region depending on the  
 240 turnover. In cases of high turnover, it may be necessary to modify the growth law to avoid ‘negative growth’  
 241 ( $\partial \gamma / \partial t < 0$ ).

242 **D. Circumnutation.** In the case of circumnutation, we assume the existence of an axial flow of auxin from a  
 243 source point. The only difference here is that the auxin gradient originating at the source has a rotational  
 244 component in the cross section. In the general case, we assume that an internal oscillator produces a  
 245 time-varying auxin gradient at the point  $s = s_c$ , i.e.

$$246 \quad A(s_c, x_1, x_2, t) = \kappa(\cos \theta x_1 + \sin \theta x_2),$$

where  $\kappa = \kappa(t)$  gives the size of the gradient and  $\theta = \theta(t)$  describes the orientation in the cross-section.  
 This oscillating gradient provides a simple auxin-level description of the complex mechanisms generating  
 the internal oscillator that are only beginning to be understood (11). The derivation of curvature evolution

is the same as in the phototropism case, simply with  $\mathbf{e}_1(t)$  replaced by  $\cos(\theta(t))$  and  $\mathbf{e}_2(t)$  replaced by  $\sin(\theta(t))$ . Following the same steps, we obtain the curvature evolution laws

$$\frac{\partial \hat{\mathbf{u}}_1}{\partial t} = \mathcal{C}_{\text{circ}} \sin\left(\theta\left(t - \frac{|s - s_c|}{U}\right)\right) e^{-\frac{Q}{U}|s - s_c|}, \quad [43]$$

$$\frac{\partial \hat{\mathbf{u}}_2}{\partial t} = -\mathcal{C}_{\text{circ}} \cos\left(\theta\left(t - \frac{|s - s_c|}{U}\right)\right) e^{-\frac{Q}{U}|s - s_c|}. \quad [44]$$

247 where  $\mathcal{C}_{\text{circ}} = \beta\kappa$ . Note that the model provided in the main text corresponds to the particular choice of a  
248 constant rotation rate for the oscillator,  $\theta = \omega t$ .

**E. Thigmotropism.** For thigmotropism, we assume that physical contact occurs at a point  $s_c$ , and with angle in the local basis  $\psi_c$ ; that is, the point in physical space

$$\mathbf{r}(s_c, t) + R(\cos \psi_c \mathbf{d}_1(s_c, t) + \sin \psi_c \mathbf{d}_2(s_c, t)),$$

249 where  $R$  is the cross-sectional radius. Geometrically, generating the helical shape of a twining plant requires  
250 establishing a growth gradient which rotates along the axis of the plant with increasing arc length (12).  
251 In terms of auxin transport, it has been observed that point contact creates a sharp rise in asymmetric  
252 auxin concentration at the stimulus point that is transported along the stem (13, 14). This suggests that  
253 we impose as a boundary condition at the contact point an auxin gradient, with minimum auxin at the  
254 contact point, i.e.

$$A(x_1, x_2, s_c, t) = -\kappa(\cos \psi_c x_1 + \sin \psi_c x_2), \quad [45]$$

256 where  $\kappa$  characterizes the strength of the tropic response (which may, for instance, be connected to the  
257 magnitude of the contact force).

258 We then assume that auxin flux consists of a rotational cross-sectional component with angular velocity  
259  $\omega$ , and an axial component with velocity  $U$ , thus generating a helical auxin gradient along the stem. The  
260 angular component may be seen as a proxy for (largely unknown) underlying mechanisms that generate  
261 the rotational component of growth gradient needed for helical twining. For instance, in nutating roots,  
262 a circumferential wave of ion flux is engaged; ion fluxes may interact with auxin (15), and also appear  
263 sensitive to touch (11), thus providing a possible mechanism.

264 Following these assumptions, the auxin transport equation is thus

$$\frac{\partial A}{\partial t} + \text{sign}(s - s_c) \frac{\partial}{\partial s} (UA) + \nabla \cdot (A r \omega \mathbf{e}_\theta) = -QA. \quad [46]$$

266 Here the sign function accounts for the flow away from the contact point in either direction, the divergence  
267  $\nabla \cdot (\cdot)$  is only with respect to the cross-sectional variables,  $r$  is the radial position vector within a cross  
268 section, and  $\mathbf{e}_\theta$  is the circumferential unit vector in the cross section. Since the curvature response is largely  
269 localized to the region near the contact point, we neglect any time delay that would occur due to axial  
270 transport, and thus consider the steady-state auxin concentration. Setting  $\partial A / \partial t = 0$ , the exact solution is  
271 given by

$$A = -\kappa \left[ \cos\left(\psi_c + \frac{\omega}{U} \text{sign}(s - s_c)\right) x_1 + \sin\left(\psi_c + \frac{\omega}{U} \text{sign}(s - s_c)\right) x_2 \right] e^{-\frac{Q}{U}|s - s_c|}. \quad [47]$$

273 From here, the evolution equations for  $\hat{\mathbf{u}}_i$  follow naturally from Eq. (19), by multiplying by  $x_i$  and integrating  
274 over a cross section, again with the use of Eq. (14).

275 **F. Multiple signals.** We model multiple simultaneous signals as an additive effect to the growth response.  
276 In particular, consider two stimuli A and B. Letting the auxin concentration under stimulus A be denoted  
277  $A_A$ , and similarly  $A_B$  for stimulus B, the axial growth law is adapted to

$$\frac{\partial g}{\partial t} = \beta(A_A + A_B - A^*). \quad [48]$$



279 An alternative approach would be to formulate a single transport equation with combined flux and/or  
 280 boundary conditions for each stimulus; however, this would likely negate the mathematical techniques  
 281 by which we have obtained explicit curvature and growth evolution laws and thus necessitate a fully  
 282 computational approach. The assumption of separated auxin flows for each stimulus, as utilized here,  
 283 reflects the differing signal transduction pathways that exist for different stimuli, and leads to an additive  
 284 growth response, as has been observed to hold reasonably well in the case of photogravitropism (16, 17). In  
 285 this way, if tropisms A and B lead to the individual curvature laws

$$\frac{\partial \hat{u}_i}{\partial t} = f_A^{(i)}, \quad \frac{\partial \hat{u}_i}{\partial t} = f_B^{(i)}, \quad i = 1, 2 \quad [49]$$

287 respectively, then the curvature evolution under the combined influence of signals A and B is simply

$$\frac{\partial \hat{u}_i}{\partial t} = f_A^{(i)} + f_B^{(i)}. \quad [50]$$

289 It is also worth noting that different tropisms may act via different hormones, and that auxin affects  
 290 multiple hormonal pathways (18), potentially acting on different cells within a cross section. In this way,  
 291 competition between different tropic responses could appear at the level of the cross-sectional growth field  
 292  $g$  even within a single auxin field.

## 293 5. Gravitropism metrics

294 The metrics used in quantifying the gravitropic response with a rotating base are defined as follows:

- 295 1. **Alignment** =  $\frac{1}{L} \int_0^L (\mathbf{d}_3(S) \cdot \mathbf{e}_z)^2 \, dS$ , with  $\mathbf{e}_z = (0, 0, 1)$
- 296 2. **Curvature** =  $\frac{1}{L} \int_0^L \sqrt{\mathbf{u}_1^2(S) + \mathbf{u}_2^2(S)} \, dS$
- 297 3. **Torsion** =  $\frac{1}{L} \int_0^L \left( \frac{u_2'(S)u_1(S) - u_1'(S)u_2(S)}{u_1^2(S) + u_2^2(S)} \right)^2 \, dS$

298 The formulas for curvature and torsion follow from Section 1.

## 299 6. Escape from the shade - mechanical contact

300 In simulating the escape from the shade in photogravitropism (main text Fig. 7), contact with the rigid,  
 301 shade-creating obstacle becomes an issue. Contact at a point  $s = s_c$  induces a contact force  $\mathbf{f}_c$  that must be  
 302 accounted for. We assume that the plant may slide along the surface without friction, so that the contact  
 303 force acts only in the normal direction. Working in a planar geometry with tangent  $\mathbf{d}_3$  and transverse  
 304 direction  $\mathbf{d}_1$ , this may be expressed as  $\mathbf{f}_c = f_c \mathbf{d}_1$ . The balance of linear momentum is then

$$\mathbf{n}'(s) = \rho g \mathbf{e}_y + f_c \mathbf{d}_1 \delta(s - s_c). \quad [51]$$

306 Here we have included self-weight with gravity  $g$  acting in the negative  $\mathbf{e}_y$  direction and linear density  $\rho$ .  
 307 The delta function  $\delta(s - s_c)$  accounts for contact at a single point, and creates a jump in the resultant force  
 308  $\mathbf{n}$ . Both  $f_c$  and  $s_c$  are unknown values that must be determined at each point in the evolution as part  
 309 of the solution to the boundary value problem. To determine the two additional unknowns, the system  
 310 requires two additional conditions, which are that the point  $\mathbf{r}(s_c(t), t) = \mathbf{p}$ , where  $\mathbf{p}$  is the fixed contact  
 311 point of the obstacle, and we highlight that the contact location along the rod may change with time (since  
 312 the motion is restricted to a plane, this vector equation consists of the required two scalar conditions).

313 In simulating this problem, we first integrate the system without contact, monitoring whether any point  
 314 is near the obstacle, and stopping once a point along the rod first reaches the obstacle, i.e the first time  
 315  $t = t^*$  at which there exists an  $s = s^*$  for which  $\mathbf{r}(s^*, t^*) = \mathbf{p}$ . At this point, Eq. (51) has a solution with  
 316  $f_c = 0, s_c = s^*$ . For  $t > t^*$ , we then integrate the system with force balance (Eq. (51)). As a numerical

317 shooting procedure, we integrate from  $s = 0$  to  $s = \ell$ , in which case the other unknowns are the moment  
 318  $\mathbf{m} = m\mathbf{e}_z$  and the force components  $\mathbf{n} = n_x\mathbf{e}_x + n_y\mathbf{e}_y$  at  $s = 0$ . The 5 conditions to determine the shooting  
 319 variables consist of the contact condition  $\mathbf{r}(s_c(t), t) = \mathbf{p}$ , and the three conditions that make up the free  
 320 end boundary condition  $\mathbf{m} = \mathbf{n} = \mathbf{0}$  at  $s = \ell$ . In this way, we employ standard continuation techniques to  
 321 increment the system beyond  $t^*$ .

## 322 7. Comparison with kinematic models

323 In this section we demonstrate under which limits and assumptions the curvature evolution laws we have  
 324 derived correspond with existing kinematic descriptions in the literature.

325 **A. Gravitropism.** As noted in the main text, the gravitropism model immediately reduces to the classic  
 326 ‘sine law of gravitropism’ (19, 20) when the deformation is restricted to a plane, and generalizes this model  
 327 for 3D deformations. Furthermore, if the autotropism term is included in the growth law Eq. (21), we  
 328 recover in the planar case the widely used “graviproprioceptive” model, which is a modified sine law that  
 329 includes autotropism (21). Both the sine law and the graviproprioceptive model have been validated against  
 330 experiments involving different plant species (with the conclusion that the latter generally provides a more  
 331 accurate description (21)).

332 **B. Phototropism.** In the case of phototropism, we compare our formulation with the kinematic description  
 333 of (17) which includes the combined influences of gravitropism, phototropism, and autotropism. In the case  
 334 when photoception is apical, they posit the curvature evolution equation

$$335 \quad \frac{\partial C}{\partial t} = -\nu(A(L, t) - A_p) - \beta A - \gamma C, \quad [52]$$

336 where they use  $C(s, t)$  to denote the plant curvature (considering only planar deformations),  $A_p$  is the  
 337 angle the light source makes with the vertical, and the sensitivity to phototropism, gravitropism, and  
 338 autotropism are respectively described by the parameters  $\nu$ ,  $\beta$ , and  $\gamma$ . Focusing only on the phototropic  
 339 response, as in our framework the curvature at each point along the stem updates based on the orientation  
 340 of the tip with respect to the light source; note that in this description the signal is assumed to propagate  
 341 instantaneously so that at each point along the stem it is the orientation of the tip at the *current* time that  
 342 dictates the curvature change.

343 Comparing with our evolution equation Eq. (39), we recover Eq. (52) (with  $\beta = \gamma = 0$ ) under the  
 344 following assumptions: (i) the deformation is planar so that bending only occurs about the  $\mathbf{d}_1$  axis, (ii) the  
 345 light is assumed to be a plane wave making angle  $A_p$  with the vertical (as opposed to a point source in our  
 346 formulation), (iii) the angle between light source and the tangent  $\mathbf{d}_3$  at the tip is small, and (iv) in the  
 347 limit of  $U \rightarrow \infty$ .

348 Regarding conditions (ii) and (iii), note that for a planar deformation the tip orientation can be  
 349 described by the angle  $\alpha$  between the vertical and the tangent, so that  $\mathbf{d}_3 = (\sin \alpha, \cos \alpha, 0)$ , and we have  
 350  $\mathbf{d}_2 = (-\cos \alpha, \sin \alpha, 0)$ . Following the description above, the unit vector pointing towards the light source  
 351 is given by  $\mathbf{e} = (\sin(A_p), \cos(A_p), 0)$ . We thus obtain

$$352 \quad \mathbf{e}_2 = \mathbf{e} \cdot \mathbf{d}_2 = \sin(\alpha - A_p) \approx \alpha - A_p.$$

353 Plugging this form into Eq. (39) under the limit  $U \rightarrow \infty$  thus reads

$$354 \quad \frac{\partial \hat{u}_1}{\partial t} = -C_{\text{photo}}(\alpha - A_p),$$

355 which is identical to the phototropism version of Eq. (52) under the substitution  $\hat{u}_1 = C$ .

356 **C. Nutation.** For the problem of nutation, we compare with the recent kinematic description of (22). While  
 357 the notations and mathematical descriptions significantly differ from our work, the conceptual idea is  
 358 similar. Namely, the time varying nutational curvature is developed due to an internal oscillator that  
 359 creates a time varying growth axis and growth differential. In the notation of (22), the growth axis is given  
 360 by prescribing a function  $\psi_g(s, t)$ , which is the angle in each cross-section of the growth axis, while the  
 361 degree of curvature-inducing differential growth is dictated by prescribing a function  $\Delta(\psi_g)\dot{E}$ . While the  
 362 kinematic description is outlined for generic forms, in practice the authors assume that  $\psi_g$  and  $\Delta(\psi_g)\dot{E}$  are  
 363 only functions of time, i.e. at each time the differential growth field is the same along the length of the  
 364 plant. They then consider tip patterns in terms of these functions, and demonstrate that circular motion,  
 365 elliptical motion, and more complex motion can all be obtained. These patterns are in good agreement  
 366 with experimental observations.

367 In our notation, the internal oscillator is given by a time-varying auxin source at a single point (typically  
 368 the tip), and the orientation and degree of differential growth at each point along the length arises as a  
 369 result of the axial transport of auxin from the tip. In particular, recall that we impose a form of auxin at  
 370 the tip

$$A_{\text{tip}} = \kappa(\cos \theta x_1 + \sin \theta x_2),$$

372 where  $\theta = \theta(t)$  gives the orientation of the auxin gradient due to the internal oscillator, playing an equivalent  
 373 role to the function  $\psi_g(t)$  in (22), and the degree of growth differential is determined both by the the auxin  
 374 tip gradient  $\kappa$ , which may be taken to be a function of time in general, as well as the sensitivity parameter  
 375  $\beta$  in the growth law Eq. (18).

376 While the transport velocity  $U$  and turnover  $Q$  of auxin will generate a non-uniform growth response in  
 377 our framework, we recover the kinematic description of (22) in the limit  $U \rightarrow \infty$ .

## 378 8. Parameters and details of simulations

379 In this section we provide the parameter choices and other relevant details for each of the simulations  
 380 appearing in the main text and/or supplementary movies. Note that in most cases, we do not consider  
 381 specific plants, but rather seek to demonstrate the qualitative behavior of the system in different parameter  
 382 regimes. Thus, we are not concerned here with specific dimensional values, since it is the ratio of different  
 383 dimensional parameters that dictates the qualitative behavior. Therefore, where possible we have scaled  
 384 parameters to unity, e.g. the initial rod length can always be taken to equal 1, while varying parameters  
 385 that enable to explore the qualitative regimes. This choice is not restrictive and amounts to measure all  
 386 distances with respect to this unit length.

387 **A. Computational details.** The models that we have derived are quite simple from a computational perspec-  
 388 tive as they only involve integration along the arc length. Hence they are all formulated as boundary value  
 389 problems for ordinary differential equations. Therefore, these equations do not require a dedicated code and,  
 390 in each scenario, the resulting rod evolution equations were simply solved using *NDSolve* in *Mathematica*  
 391 (23). In the absence of self-weight or other forces, this is a trivial matter: in such cases  $\mathbf{n} = \mathbf{m} = \mathbf{0}$  and the  
 392 curvature  $\mathbf{u}$  is equal to the intrinsic curvature  $\hat{\mathbf{u}}$ , thus Eqs. (3) and (4) may simply be integrated forward  
 393 from the clamped base at each time step, and then the intrinsic curvature  $\hat{\mathbf{u}}$  is updated quasi-statically.

394 In cases that include self-weight or other forces, the rod equations at each time step were solved via a  
 395 numerical shooting method implemented within *NDSolve*. The full system of Eqs. (3), (4) and (8)–(10) is  
 396 solved by imposing the boundary conditions Eq. (12) at the base, and integrating to the tip with shooting  
 397 variables  $\mathbf{m}(0)$  and  $\mathbf{n}(0)$  chosen to match the tip boundary conditions Eq. (13). The shooting variables at  
 398 one time step form a sufficient guess for the next step, after the intrinsic curvature is updated quasi-statically,  
 399 and convergence to a solution is rapid so that total simulation time is on the order of seconds. Mathematical  
 400 notebooks are available in the online Supplementary material with sample code for simulating each of the  
 401 tropic scenarios modeled.

**B. Gravitropism: rotating base.** In simulating the rotating base under gravitropism (Fig. 4 main text), we orient the base at angle  $\phi_0$  from the vertical  $\mathbf{e}_z$  direction (note that in terms of the angle  $\theta$  appearing schematically in Fig. 3(A) of the main text, we have  $\theta = \pi/2 - \phi_0$ ). Expressed in terms of the spherical unit vectors  $\mathbf{e}_r = (\sin \phi_0, 0, \cos \phi_0)$ ,  $\mathbf{e}_\phi = (\cos \phi_0, 0, -\sin \phi_0)$ ,  $\mathbf{e}_\theta = (0, 1, 0)$ , the frame at the point  $S = 0$  is then given the form

$$\mathbf{d}_3(0, t) = \mathbf{e}_r \quad [53]$$

$$\mathbf{d}_1(0, t) = \cos(2\pi\omega t)\mathbf{e}_\phi + \sin(2\pi\omega t)\mathbf{e}_\theta \quad [54]$$

$$\mathbf{d}_2(0, t) = -\sin(2\pi\omega t)\mathbf{e}_\phi + \cos(2\pi\omega t)\mathbf{e}_\theta. \quad [55]$$

402 We fix  $\omega = 1$ , which is equivalent to scaling time based on the rotation rate of the base. We also set  
 403  $\phi_0 = \pi/3$  and scale the total length  $L = 1$ . We simulate the gravitropic curvature laws with no axial growth  
 404 and response rate  $\mathcal{C}_{\text{grav}}$  taking values of  $\mathcal{C}_{\text{grav}} = \{0.1, 1, 10, 50\}$ . In this simulation we ignore the effect of  
 405 self-weight, so that mechanical equilibrium is automatically satisfied with  $\mathbf{u} = \hat{\mathbf{u}}$ ; we thus integrate Eqs. (3)  
 406 and (4) to determine the morphology at each time step, and then update the curvature. Each parameter  
 407 set is simulated up to time  $t = 3$ , which corresponds to three complete rotations of the base.

### 408 C. Phototropism.

409 **Fixed light source.** In simulating planar phototropism for a fixed light source (Fig. 5 of the main text), a  
 410 light source is placed at the point  $(1, 1)$ , and the parameters  $\ell = 1$ ,  $U = 1$ , and  $\gamma \equiv 1$  (no axial growth) are  
 411 fixed. This is equivalent to scaling time based on axial transport. The plant is clamped at the origin with  
 412 tangent  $\mathbf{d}_3 = (0, 1)$  at  $s = 0$ . We then simulate up to  $t = 10$  for each combination of the parameter choices  
 413  $Q = \{1, 5\}$ ,  $\mathcal{C}_{\text{photo}} = \{0.5, 2.5\}$ , to represent the different regimes of high and low turnover and phototropic  
 414 response, respectively.

415 Note also that in simulating the time-delay differential equations, it is necessary to provide the form  
 416 of the functions  $\mathbf{e}_i$ ,  $i = 1, 2$  for  $-\ell/U \leq t < 0$ . These are chosen to be constant and equal to the value at  
 417  $t = 0$ , determined by the initial orientation.

418 **Moving light source - day/night cycle.** To simulate a day/night cycle (Fig. 6 of main text), we set  $U = 1$ ,  
 419  $\ell = 1$ ,  $Q = 0.1$ ,  $\gamma \equiv 1$ , and  $\mathcal{C}_{\text{photo}} = 1.5$ . A light source with intensity  $I(t) = \max\{0, \sin \omega t\}$  follows the  
 420 path  $\mathbf{p}(t) = (R \cos \omega t, Y, R \sin \omega t)$ , where  $\omega = 0.2$ ,  $R = 3$ , and  $Y = 2$ .

421 In the case of the additional autotropism terms, we increase  $\mathcal{C}_{\text{photo}}$  to 3 and set  $\xi = 0.3$ . The increase in  
 422  $\mathcal{C}_{\text{photo}}$  is chosen so that the motion during the day is similar to the non-autotropic case, as the autotropism  
 423 serves to diminish the phototropic response in the presence of a stimulus. In both cases, one complete  
 424 period is simulated, corresponding to day – when  $I(t) > 0$ , and night – when  $I(t) = 0$ .

### 425 D. Photogravitropism.

426 **Fixed light source.** For the simulations of main text Fig. 7 (A)-(E), we fix the parameters  $U = 1$ ,  $Q = 0.1$   
 427 and  $\mathcal{C}_{\text{photo}} = 1$ . Growth is uniform and linear:  $\gamma = 1 + ct$  with  $c = 0.1$ , and initial length  $L = 1$ . A light  
 428 source is placed at the point  $\mathbf{p} = (4, 1)$ . The plant is clamped at the origin with tangent  $\mathbf{d}_3 = (0, 1)$  at  
 429  $s = 0$ . We then simulate up to  $t = 10$  for each combination of the parameter choices  $G = \{0.25, 2.5\}$ ,  
 430  $\mathcal{C}_{\text{grav}} = \{0.1, 1\}$ . Here the parameter  $G$  characterizes the effective impact of self-weight under gravity. In  
 431 particular, by scaling rod length by  $L$ , moment by  $E_b/L$  where  $E_b$  is the bending stiffness, and noting that  
 432 the gravitational force has magnitude  $\rho g$ , the non-dimensional moment balance equation, expressed in the  
 433 reference variable  $S$ , is

$$434 \quad m'(S) = -\gamma^2 G(S - 1) \cos(\theta(S)), \quad G := \frac{\rho g L^3}{E_b} \quad [56]$$

435 where  $\theta$  is the angle between the tangent and the  $x$ -axis. In obtaining Eq. (56) we have used the geometric  
 436 expression  $\mathbf{r}'(S, t) = \gamma \mathbf{d}_3 = \gamma(\cos \theta \mathbf{e}_x + \sin \theta \mathbf{e}_y)$ , and that the solution to the force balance  $\mathbf{n}'(S) = \gamma \rho g \mathbf{e}_y$   
 437 subject to  $\mathbf{n} = \mathbf{0}$  at  $S = L$  is  $\mathbf{n} = \rho g(S - L) \mathbf{e}_y$ .

438 Thus, the parameter choices for  $G$  and  $C_{\text{grav}}$  represent the different regimes of high and low mass/gravity  
 439 and gravitropic response, respectively.

440 **Canopy escape.** In simulating the escape from shade (Fig. 7 (D)-(E) in main text), we have set  $U = 1$ ,  
 441  $Q = 0.5$ ,  $C_{\text{photo}} = 1$ ,  $C_{\text{grav}} = 0.1$ ,  $\gamma = 1 + 0.25t$ ,  $G = 0.05$  (see parameter description above). The initial  
 442 length is  $L = 1$ , and the plant is clamped at the origin with tangent  $\mathbf{d}_3 = (0, 1)$  at  $s = 0$ . The shade  
 443 creating obstacle occupies the region  $(x, y)$  with  $x \leq 1$ ,  $y \geq 1.2$ , so that the corner point and eventual  
 444 contact point is  $\mathbf{p} = (1, 1.2)$ .

**E. Circumnutation.** For the simulations of circumnutation, main text Fig. 8 (A)-(B), the internal oscillator  
 is located at the tip, with angular velocity  $\omega = 1$ ; thus the period is  $2\pi$  and we simulate one complete  
 period. Plant length is scaled to  $L = 1$ , and axial growth is turned off ( $\gamma \equiv 1$ ). In Fig. 8 (A) other  
 parameters are  $U = 5$ ,  $Q = 5$ ,  $C_{\text{circ}} = 2$ ; in Fig. 8 (B) we use  $U = 5$ ,  $C_{\text{circ}} = 1$ , and we vary the turnover:  
 $Q \in \{1, 2, 3, \dots, 10\}$ . In Fig. 8 (C) the parameters are  $U = 5$ ,  $Q = 5$ ,  $C_{\text{circ}} = 1$ , and the angular velocity is  
 non-uniform; in particular the auxin gradient at the tip follows the line

$$\cos \theta x_1 + \sin \theta x_2,$$

with

$$\theta(t) = \omega t + \alpha \sin \hat{\omega} t.$$

445 The tip profiles in the figure are plotted for  $\omega = 1$ ,  $\hat{\omega} = 5$ , and varying  $\alpha = \{0, 0.15, 0.3, \dots, 1.5\}$ .

446 In these simulations we have also given the plant an initial curvature, which serves to better center  
 447 the motion about the base of the plant, for visualization purposes (the initial curvature only creates a  
 448 translation of the tip pattern). The initial curvatures used were as follows:  $\mathbf{u}_1 = 0$  in Fig. 8 (A)-(C), while  
 449  $\mathbf{u}_2 = 1.25$  in Fig. 8 (A),  $\mathbf{u}_2 = 0.5$  in Fig. 8 (B), and  $\mathbf{u}_2 = 0.45 - 0.07\alpha$  in Fig. 8 (C) (this choice was made  
 450 to avoid overlapping of the tip patterns with varying  $\alpha$ ).

451 **F. Thigmotropism.** In simulating thigmotropism, main text Fig. 8 (D)-(F), we have set  $C_{\text{thig}} = 10$ , and  
 452 varied the turnover  $Q$  and angular velocity  $\omega$  as follows:  $Q = 3, \omega = 2$  in Fig. 8 (D),  $Q = 3, \omega = 6$  in Fig. 8  
 453 (E), and  $Q = 5, \omega = 6$  in Fig. 8 (F). Again, axial growth is turned off and the plant length is  $L = 1$ . In  
 454 each case total simulation time is  $t = 10$ . In the thigmotropism formulation, with the signal coming from a  
 455 single point, the curvatures may be determined exactly, given by

$$\mathbf{u}_1 = -C_{\text{thig}} \exp\left(-\frac{QS}{U}\right) \sin\left(\psi_0 + \frac{\omega S}{U}\right) t, \quad [57]$$

$$\mathbf{u}_2 = C_{\text{thig}} \exp\left(-\frac{QS}{U}\right) \cos\left(\psi_0 + \frac{\omega S}{U}\right) t. \quad [58]$$

459 Here the angle  $\psi_0$  indicates the point of contact (which is set at  $s = 0$ ). In the presented simulations,  
 460  $\psi_0 = \pi/2$ , so that the contact point is at  $\mathbf{r}(0, t) + a\mathbf{d}_2$ , where  $a$  is the cross-sectional radius, which was fixed  
 461 at  $a = 0.02$ . From the formulas in Section 1, we then obtain that the curvature  $\kappa$  and torsion  $\tau$  will evolve  
 462 according to

$$\kappa = C_{\text{thig}} \exp\left(-\frac{QS}{U}\right) t \quad [59]$$

$$\tau = \frac{\omega}{U}. \quad [60]$$

466 Note that a helix of radius  $\alpha$  and pitch  $\beta$  (i.e. where the angle of the helix  $\phi$  satisfies  $\tan \phi = \beta/\alpha$ ) has  
 467 curvature  $\hat{\kappa} = \alpha/(\alpha^2 + \beta^2)$  and torsion  $\hat{\tau} = \beta/(\alpha^2 + \beta^2)$ . Since the torsion of the plant is fixed by the ratio  
 468 of rotational to axial auxin velocity, Eq. (60), and the helical radius for a pole of radius  $c$  and plant radius  
 469  $a$  is  $\alpha = c + a$ , we can solve for the pitch, or equivalently the angle  $\phi$ , which satisfies  $\sin(2\phi) = \omega(a + c)/U$ .  
 470 It follows that the curvature  $\hat{\kappa} = \cos^2 \phi/(a + c)$ ; in our simulations we have fixed the pole radius  $c = 0.05$ .

471 In this formulation, the curvature increases linearly in time at every point. This unrealistic (in long times)  
472 aspect could be corrected by having a depleting auxin source at the contact point. However, in any case we  
473 must account for the fact that the curvature cannot increase beyond  $\hat{\kappa}$ , simply due to the presence of the  
474 pole. Thus, in simulating the wrapping around a pole, at each spatial point we increase the curvatures  
475 according to Eqs. (57) and (58), until the curvature  $\kappa = \hat{\kappa}$ , where  $\kappa$  is given by Eq. (59), at which point we  
476 freeze the curvatures in the simulation (in this way, we account for the fact that the intrinsic curvature  
477 may keep increasing, but the actual curvature may not due to the mechanical contact, while avoiding the  
478 problem of having to compute the mechanical contact force density).

479 **G. Pole dance.** In SI movies, we include a simulation that consists of a plant that searches for a pole via  
480 the circumnutation model, while also undergoing axial growth, and then begins to wrap around it following  
481 the thigmotropism model once contact is made. In this simulation, the parameters used were  $U = 6$ ,  
482  $Q = 10$ ,  $\mathcal{C}_{\text{circ}} = 3$ , and circumnutation oscillator frequency  $\omega = 5$  originating at the base  $S = 0$ . The plant  
483 is clamped at the origin, has radius  $a = 0.025$ , is initially straight and has initial length  $L = 1$  and growth  
484 rate  $\partial\gamma/\partial t = 0.4$ . A vertical pole with radius  $c = 0.05$  passes through the point  $\{-0.68, -0.52, 0\}$ . The  
485 plant first makes contact with the pole at time  $t = 3$ , and at contact point defined by reference arc length  
486  $S_c = 0.8$  and angle  $\psi_c = 2.26$  (note that rather than defining the location of the pole, we have defined  
487 the location and time of the contact, and used these to define the pole; we then verify that with the pole  
488 defined in this way, no prior contact was made).

489 Once contact is made, we turn off the circumnutation signal, and only evolve the portion of the plant,  
490  $S > S_c$ , i.e. from pole to end. This follows the thigmotropism curvature evolution, with parameters  
491  $U = 1$ ,  $Q = 3$ ,  $\mathcal{C}_{\text{thig}} = 9$ , and  $\omega = 0.77$ . The choice of  $\omega$  is made for computational convenience, as this  
492 particular value means that the pitch of the helix is exactly equal to the angle at which contact is made,  
493 and no rotation of the tangent about the contact point is needed. The wrapping portion of the evolution is  
494 simulated from  $t = 3$  up to  $t = 4.5$ .

## 495 9. Comparison to experiment

496 Section 3 of the main text includes model comparison with 3 distinct tropic experiments, with results  
497 plotted in main text Fig. 9. Below we outline experimental and model comparison details. The objective in  
498 this analysis was to demonstrate the general validity of the modeling framework, as opposed to a detailed  
499 analysis of any given experiment; therefore model parameter choices were chosen by direct comparison with  
500 the data. We have maintained parameter consistency across different setups of the same experiment, e.g.  
501 the gravitropism sensitivity is not changed when phototropic effects are added.

502 **A. Fig. 9(A).** for this subfigure we consider the data in Fig. 1A of (24). In this set of experiments the  
503 hypocotyls of cucumber plants were subjected to gravistimulation and thigmotropism, with the resultant  
504 bending response measured over a period of 24 hours. In the control experiment, plotted as the red data  
505 points in our main text Fig. 9(A), the plants were placed in a horizontal position; the increase in curvature  
506 measures the bending towards the vertical as a gravitropic response. The blue data points correspond to an  
507 experimental setup with the plants situated vertically and given an asymmetric mechanical perturbation  
508 at the start of the experiment. This caused the plants to bend horizontally toward the direction of the  
509 stimulus, but since the stimulus did not persist they then reorient to the vertical under gravitropism;  
510 hence the increase and subsequent decrease in curvature. These are shown schematically in SI Fig. 1. In  
511 simulating these experiments, we employed a combination of gravitropism, thigmotropism, and autotropism.  
512 Note that while the authors do not specifically mention autotropism, its inclusion has been found to match  
513 gravitropic data more accurately than gravitropism alone (21); we found this to be the case as well. In the  
514 experiments, the mechanical perturbation is applied not a single point but rather by rubbing a needle along  
515 the entire length of the hypocotyl. To account for this in our model of the thigmotropic response, we make  
516 3 assumptions:

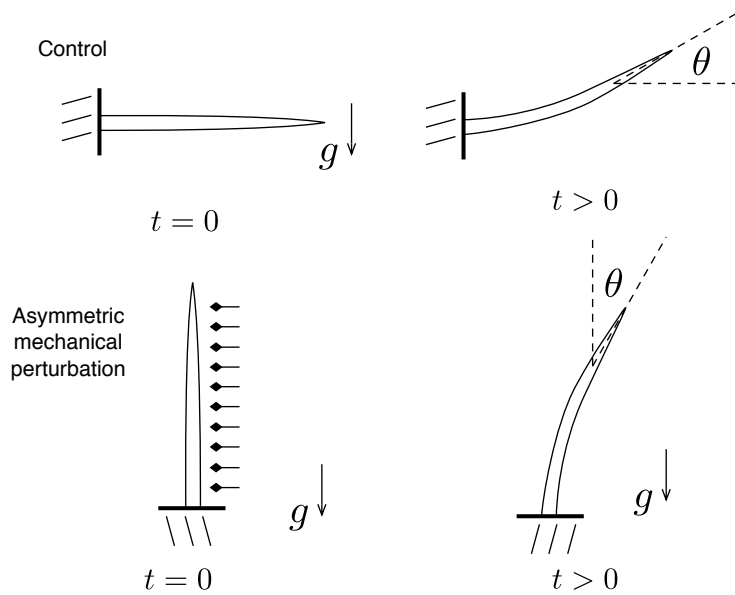

Fig. 1. Schematic for the experiments of (24) and model comparison.

- 517 1. The uniformly applied signal generates a spatially independent response.
- 518 2. The signal provided at  $t = 0$  decays exponentially with rate  $\beta$ .
- 519 3. We restrict our attention to 2D deformation, i.e. we do not allow torsion to develop.

520 With regards to point 3, the images in Fig. 3 of (24) do suggest some degree of torsion, consistent with our  
 521 model, however the sections are too short for significant torsion to develop or be measured, and moreover  
 522 only a single curvature measure is available for the data we plot. In terms of Eqs. (57) and (58), this is  
 523 equivalent to setting the angular component  $\omega$  to zero. This generates a planar deformation, for which  
 524  $\mathbf{u}_1 = 0$ , while  $\mathbf{u}_2$  satisfies

$$525 \quad \frac{\partial \mathbf{u}_2}{\partial t} = \mathcal{C}_{\text{grav}} \cos \theta(S) - \mathcal{C}_{\text{thig}} \exp(-\beta t) - \xi \mathbf{u}_2, \quad [61]$$

526 where  $\theta$  is the angle between the tangent and the horizontal axis (note gravity is oriented vertically downward  
 527 as shown in Fig. 1. To simulate the control experiment, the  $S = 0$  end is clamped at  $\theta = 0$ ; for the  
 528 thigmotropic experiment the  $S = 0$  end is clamped at  $\theta = \pi/2$ . Both scenarios were run for total time  
 529  $t = 24$  hr in correspondence with the data, and the total length is estimated to be 5 cm. The continuous  
 530 curves shown in main text Fig. 9 correspond to the angle  $\theta$  measured at the tip for the parameter choices:  
 531  $\mathcal{C}_{\text{grav}} = 0.033$  (cm.hr) $^{-1}$ ,  $\xi = 0.11$  hr $^{-1}$ ,  $\mathcal{C}_{\text{thig}} = 0.033$  (cm.hr) $^{-1}$  (and  $\mathcal{C}_{\text{thig}} = 0$  for control), and  $\beta = 0.13$   
 532 hr $^{-1}$ .

533 **B. Fig. 9(B).** This subfigure includes the circumnutation patterns appearing in Figs 3 and 4 (11) (see also  
 534 references therein for the initial studies noted in this review paper), corresponding to tip patterns measured  
 535 in three-week old sunflower plants.

536 In simulating these we aim to reproduce the diversity of patterns, which can roughly be described  
 537 as circular, elliptical, and rosette-like. We consider both circumnutation and circumnutation combined  
 538 with gravitropism. The simulations follow Eq. (43) in the case of circumnutation only, and with the  
 539 additional gravitropism terms corresponding to the right-hand sides of Eqs. (33) and (34) in the combined  
 540 circumnutation and gravitropism. For circumnutation, the auxin source and internal oscillator are located  
 541 at the tip  $s_c = 1$ , with transport parameters  $U = 15$  and  $Q = 5$ . The gravitropism response is  $\mathcal{C}_{\text{grav}} = 0.5$ .  
 542 The internal oscillator is given by

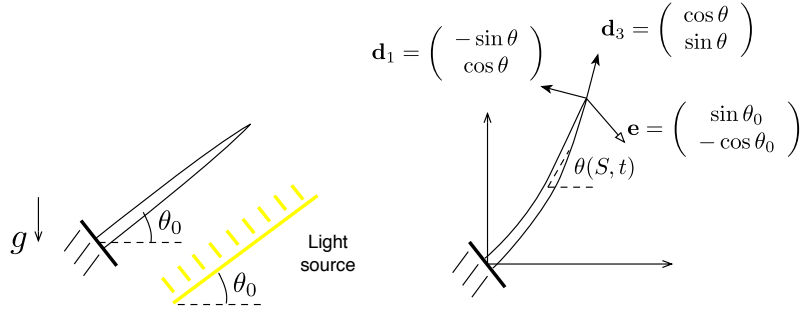

Fig. 2. Schematic for the experiments of (25) and model comparison.

- 543 1. circle (left-most plot of main text Fig. 9(B)):  $\theta(t) = t$   
 544 2. ellipse (middle plot of main text Fig. 9(B)):  $\theta(t) = t - 0.5 \sin(2t)$   
 545 3. rosette (right-most plot of main text Fig. 9(B)):  $\theta(t) = t - 0.5 \sin(1.7t)$

546 Note the small difference in  $\theta$  between the elliptical and rosette-like cases, demonstrating how a small  
 547 change in the rate of internal oscillator can produce significantly distinct patterns.

548 In each case, we simulate the motion for a total time  $t = 6\pi$ . As the experimental rosette pattern  
 549 demonstrates a spiraling out as time increases, here we have included a small axial growth component, with  
 550 growth stretch  $\gamma$  satisfying  $\dot{\gamma} = 0.02$ . For visual purposes, a constant initial curvature  $\mathbf{u}_2$  was given at time  
 551  $t = 0$  in order to center the tip pattern around the origin. This took the value  $\mathbf{u}_2 = 0.3$  for the rosette and  
 552 ellipse, and  $t = 0$  in order to center the tip pattern around the origin. This took the value  $\mathbf{u}_2 = 0.4$  for the  
 553 circle.

**C. Fig. 9(C).** This subfigure includes data from Fig. 4 of (25). In these experiments, a young poplar stem is given a gravitropic stimulus by titling of the base, and is then subjected to either an isotropic or anisotropic light stimulus. The shape of the stem was recorded at different time points, providing  $x$  and  $y$  coordinates for digitized points along the stem. This data was extracted for select time points (note that we are not showing the shape at all time points, but rather a representative sample spanning the full time-scale of the experiment). using WebPlotDigitizer, and appears as the symbols in main text Fig. 9(C). The left plot is the data for the isotropic light, the right plot has an anisotropic light source generated by neon tubes located to the right of the plant and oriented at the same angle of tilt (see (25) Fig. 3). To simulate these experiments, we use a combination of gravitropism, phototropism, and autotropism. In the case of the isotropic light, since there is no directionality, we treat this case with phototropism omitted. As the deformation is confined to a plane, the curvature  $\mathbf{u}_1 = 0$ , while  $\mathbf{u}_2$  can be described in terms of the angle  $\theta = \theta(S, t)$  between the tangent and the  $x$ -axis. The light is oriented at angle  $\theta_0$  from the horizontal, which is the same as the angle of the base, following (25) Fig. 3. The in-plane tangent vectors then satisfy

$$\mathbf{d}_1 = \begin{pmatrix} -\sin \theta \\ \cos \theta \end{pmatrix}, \quad \mathbf{d}_3 = \begin{pmatrix} \cos \theta \\ \sin \theta \end{pmatrix}$$

The unit vector pointing from the tip towards the light is given by

$$\mathbf{e} = \begin{pmatrix} \sin \theta_0 \\ -\cos \theta_0 \end{pmatrix},$$



554 from which we obtain

555 
$$\mathbf{e}_1(t) = \mathbf{d}_1(L, t) \cdot \mathbf{e} = -\cos(\theta(L, t) - \theta_0).$$

556 The curvature evolution law is thus given by

557 
$$\frac{\partial \mathbf{u}_2}{\partial t} = \mathcal{C}_{\text{grav}} \cos \theta - \mathcal{C}_{\text{photo}} \exp\left(-\frac{Q}{U} \gamma(1-S)\right) \mathbf{e}_1\left(t - \frac{\gamma(1-S)}{U}\right) - \xi \mathbf{u}_2, \quad [62]$$

558 with  $\mathbf{e}_1$  as given above. This is illustrated schematically in SI Fig. 2. The data extracted from (25) shows a  
559 significant increase in axial length over the course of the experiments. We incorporate this via a simple  
560 uniform axial extension with growth rate  $c$ , i.e. we impose  $\gamma = 1 + ct$ .

561 For tree saplings, self-weight is probably not negligible, and we have included it as outlined in SI Section  
562 D, with the impact of self-weight characterized by the single parameter  $G$  as in Eq. 56.

563 In generating the model predictions, represented by the solid curves in main text Fig. 9(C), we have used  
564 simulation parameters  $\mathcal{C}_{\text{grav}} = 0.3$ ,  $\xi = 0.1$ ,  $G = 0.3$ ,  $c = 0.06$ , and in the right column with phototropism  
565 included, we use parameters  $\mathcal{C}_{\text{photo}} = 0.11$ ,  $U = 2$ , and  $Q = 0.75$  (with gravitropic and autotropic parameters  
566 unchanged). The data indicate a longer total time represented in the anisotropic phototropism case, so we  
567 have simulated these for total time  $t = 10$  for the left column and  $t = 14$  for the right column.

568 The time between successive curves in the data is determined by the labels in the legend of (25) Fig.  
569 4. To relate these to the model predictions, we scale the total simulation time to match the difference in  
570 the first and last time points displayed in the data, and plot the simulated curves at the corresponding  
571 time points for each data curve. Explicitly, the data curves extracted are for the following time points as  
572 presented in the legends of (25) Fig. 4:

- 573 • left plot (isotropic light): {274, 281, 285, 290, 299}  
574 • right plot (anisotropic light): {172, 176, 180, 193, 201}

575 The data and simulation plots follow these time points, with color changing successively through the set  
576 {red, yellow, green, blue, purple}.

## 577 10. Description of Movies

578 **SI movie S1:** Gravitropism with rotating base, and gravitropic response parameter  $C_{\text{thig}} = 0.1$ . Other  
579 simulation parameters provided in SI Section 7.

580  
581 **SI movie S2:** Gravitropism with rotating base, and gravitropic response parameter  $C_{\text{thig}} = 1$ . Other  
582 simulation parameters provided in SI Section 7.

583  
584 **SI movie S3:** Gravitropism with rotating base, and gravitropic response parameter  $C_{\text{thig}} = 10$ . Other  
585 simulation parameters provided in SI Section 7.

586  
587 **SI movie S4:** Gravitropism with rotating base, and gravitropic response parameter  $C_{\text{thig}} = 50$ . Other  
588 simulation parameters provided in SI Section 7.

589  
590 **SI movie S5:** Phototropism, simulation of a day-night cycle, with no autotropism. Simulation parameters  
591 provided in SI Section 7.

592  
593 **SI movie S6:** Phototropism, simulation of a day-night cycle, with autotropism. Simulation parameters  
594 provided in SI Section 7.

595

596 **SI movie S7:** Thigmotropism, pole wrapping, with low turnover ( $Q = 3$ ) and low angular velocity ( $\omega = 2$ ).  
597 Other simulation details provided in SI Section 7.

598

599 **SI movie S8:** Thigmotropism, pole wrapping, with low turnover ( $Q = 3$ ) and high angular velocity ( $\omega = 6$ ).  
600 Other simulation details provided in SI Section 7.

601

602 **SI movie S9:** Thigmotropism, pole wrapping, with high turnover ( $Q = 5$ ) and low angular velocity ( $\omega = 6$ ).  
603 Other simulation details provided in SI Section 7.

604

605 **SI movie S10:** Pole dance. Circumnutation with axial growth, followed by thigmotropic pole wrapping.  
606 Simulation parameters provided in SI Section 7.

- 607 1. Moulton DE, Lessinnes T, Goriely A (2020) Morphoelastic rods III: Differential growth and curvature generation in elastic filaments. *Journal of the Mechanics and Physics of Solids* 142:104022.  
608 2. Band LR, et al. (2014) Systems analysis of auxin transport in the Arabidopsis root apex. *The Plant Cell* 26(3):862–875.  
609 3. Fozard J, Bennett M, King J, Jensen O (2016) Hybrid vertex-midline modelling of elongated plant organs. *Interface Focus* 6(5):20160043–14.  
610 4. Chauvet H, Mouliia B, Legué V, Forterre Y, Pouliquen O (2019) Revealing the hierarchy of processes and time-scales that control the tropic response of shoots to gravi-stimulations. *Journal of experimental botany* 70(6):1955–1967.  
611 5. Mitchison G (2015) The Shape of an Auxin Pulse, and What It Tells Us about the Transport Mechanism. *PLoS Computational Biology* 11(10):e1004487–25.  
612 6. Larsen P (1955) Growth substances in higher plants in *Moderne Methoden der Pflanzenanalyse/Modern Methods of Plant Analysis*. (Springer), pp. 565–625.  
613 7. Band LR, King JR (2011) Multiscale modelling of auxin transport in the plant-root elongation zone. *Journal of mathematical biology* 65(4):743–785.  
614 8. Digby J, Finn R (1995) The gravitropic set-point angle (gsa): the identification of an important developmentally controlled variable governing plant architecture. *Plant, cell & environment* 18(12):1434–1440.  
615 9. Roychoudhry S, Del Bianco M, Kieffer M, Kepinski S (2013) Auxin Controls Gravitropic Setpoint Angle in Higher Plant Lateral Branches. *Current Biology* 23(15):1497–1504.  
616 10. Hohm T, et al. (2014) Plasma membrane h<sup>+</sup>-atp ase regulation is required for auxin gradient formation preceding phototropic growth. *Molecular systems biology* 10(9):751.  
617 11. Stolarz M (2014) Circumnutation as a visible plant action and reaction. *Plant Signaling & Behavior* 4(5):380–387.  
618 12. Silk WK (1989) On the Curving and Twining of Stems. *Environmental and Experimental Botany* 29(1):95–109.  
619 13. Lee HJ, Kim HS, Park JM, Cho HS, Jeon JH (2020) PIN-mediated polar auxin transport facilitates root–obstacle avoidance. *New phytologist* 225(3):1285–1296.  
620 14. Reinhold L, Sachs T, Vislovska L (1972) The role of auxin in thigmotropism in *Plant Growth Substances 1970*. (Springer), pp. 731–737.  
621 15. Shabala SN, Newman IA (1997) Root nutation modelled by two ion flux-linked growth waves around the root. *Physiologia Plantarum* 101:770–776.  
622 16. Galland P (2002) Tropisms of avena coleoptiles: sine law for gravitropism, exponential law for photogravitropic equilibrium. *Planta* 215(5):779–784.  
623 17. Bastien R, Douady S, Mouliia B (2015) A Unified Model of Shoot Tropism in Plants: Photo-, Gravi- and Proprio-ception. *PLoS Computational Biology* 11(2):e1004037–30.  
624 18. Semeradova H, Montesinos JC, Benkova E (2020) All roads lead to auxin: Post-translational regulation of auxin transport by multiple hormonal pathways. *Plant Communications* p. 100048.  
625 19. Sachs J (1882) *Vorlesungen über Pflanzen-Physiologie*. (W. Engelmann) Vol. 1.  
626 20. Mouliia B, Fournier M (2009) The power and control of gravitropic movements in plants: a biomechanical and systems biology view. *Journal of experimental botany* 60(2):461–486.  
627 21. Bastien R, Bohr T, Mouliia B, Douady S (2013) Unifying model of shoot gravitropism reveals proprioception as a central feature of posture control in plants. *PNAS* 110(2):755–760.  
628 22. Bastien R, Meroz Y (2016) The Kinematics of Plant Nutation Reveals a Simple Relation between Curvature and the Orientation of Differential Growth. *PLoS Computational Biology* 12(12):e1005238–20.  
629 23. Wolfram Research, Inc. (2019) Mathematica, Version 12.0. Champaign, IL, 2019.  
630 24. Jaffe MJ, Takahashi H (1990) Thigmotropism and the inodulation of tropistic curvature by mechanical perturbation in cucumber hypocotyls. *Physiologia Plantarum* 80:561–567.  
631 25. Coutand C, Adam B, Ploquin S, Mouliia B (2019) A method for the quantification of phototropic and gravitropic sensitivities of plants combining an original experimental device with model-assisted phenotyping: Exploratory test of the method on three hardwood tree species. *PLoS one* 14(1):e0209973–28.
